# Supplementary material for: Potent Anti‐SARS‐CoV‐2 Efficacy of COVID‐19 Hyperimmune Globulin from Vaccine‐Immunized Plasma
Source: PubMed Central journal article supplement (PMC9108634; doi:10.1002/advs.202104333), 2022-04-11
Supplement: ADVS-9-2104333-s001.pdf [file ADVS-9-2104333-s001.pdf]

## Supporting Information

### Potent Anti-SARS-CoV-2 Efficacy of COVID-19 Hyperimmune Globulin from Vaccine-Immunized Plasma

Ding Yu,<sup>1,2†</sup> Yu-Feng Li,<sup>3†</sup> Hong Liang,<sup>1,2†</sup> Jun-Zheng Wu,<sup>1†</sup> Yong Hu,<sup>4</sup> Yan Peng,<sup>4</sup> Tao-Jing Li,<sup>2</sup> Ji-Feng Hou,<sup>5</sup> Wei-Jin Huang,<sup>5</sup> Li-Dong Guan,<sup>5</sup> Ren Han,<sup>4</sup> Yan-Tao Xing,<sup>4</sup> Yong Zhang,<sup>2</sup> Jia Liu,<sup>3</sup> Lu-Feng,<sup>4</sup> Chun-Yan Li,<sup>2</sup> Xiao-Long Liang,<sup>4</sup> Ya-Ling Ding,<sup>1</sup> Zhi-Jun Zhou,<sup>4</sup> De-Ming Ji,<sup>4</sup> Fei-Fei Wang,<sup>4</sup> Jian-Hong Yu,<sup>4</sup> Kun Deng,<sup>4</sup> Dong-Mei Xia,<sup>4</sup> De-Mei Dong,<sup>2</sup> Heng-Rui Hu,<sup>3</sup> Ya-Jie Liu,<sup>3</sup> Dao-Xing Fu,<sup>2</sup> Yan-Lin He,<sup>2,4</sup> Dong-Bo Zhou,<sup>2</sup> Hui-Chuan Yang,<sup>6</sup> Rui Jia,<sup>6</sup> Chang-Wen Ke,<sup>7</sup> Tao Du,<sup>2</sup> Yong Xie,<sup>2</sup> Rong Zhou,<sup>2</sup> Ce-Sheng Li,<sup>4\*</sup> Man-Li Wang,<sup>3\*</sup> Xiao-Ming Yang<sup>6\*</sup>

<sup>1</sup>Chengdu Rongsheng Pharmaceuticals Co., Ltd; Chengdu, China.

<sup>2</sup>Beijing Tiantan Biological Products Co., Ltd; Beijing, China.

<sup>3</sup>Center for Biosafety Mega-Science, Wuhan Institute of Virology, Chinese Academy of Sciences; Wuhan, China.

<sup>4</sup>Sinopharm Wuhan Plasma-derived Biotherapies Co., Ltd; Wuhan, China.

<sup>5</sup>National Institute for Food and Drug Control of China; Beijing, China.

<sup>6</sup>China National Biotec Group Company Limited; Beijing, China.

<sup>7</sup>Guangdong Provincial Center for Disease Control and Prevention; Guangzhou, China.

\*Corresponding authors: Email: yangxiaoming@sinopharm.com (X.M.Y.); wangml@wh.iov.cn (M.L.W.); licesheng@sinopharm.com (C.S.L.).

†These authors contributed equally to this work.

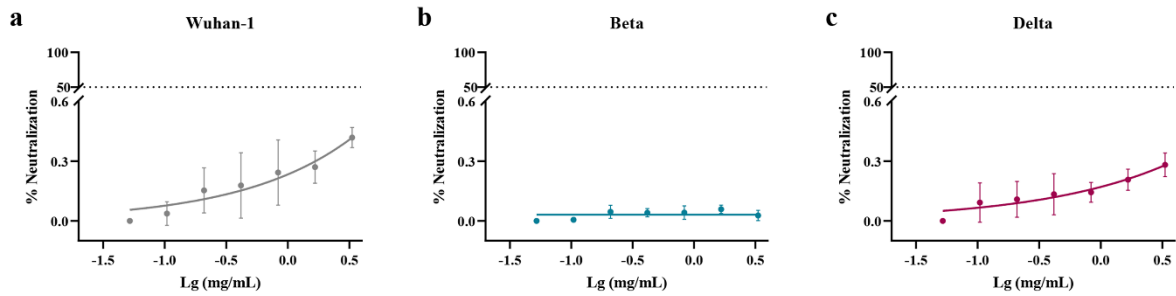

**Figure S1. Assessment of the antiviral activity of IVIG against SARS-CoV-2 pseudotyped viruses *in vitro*.** (a-c) IVIG showed no neutralization effect against pseudotyped SARS-CoV-2 Wuhan-1 (a), Beta (b), and Delta (c) strains. Pseudotyped viruses were pre-incubated with serial dilutions of COVID-HIG at different concentrations for 1 h at 37°C. Next, Huh-7 cells were incubated with the pseudotyped viruses for 24 h. Luciferase was detected to assess infection. The y-axis represents percent inhibition. Data are shown as mean  $\pm$  SD of three independent experiments ( $n = 3$ ). IVIG, human immune globulin intravenous.

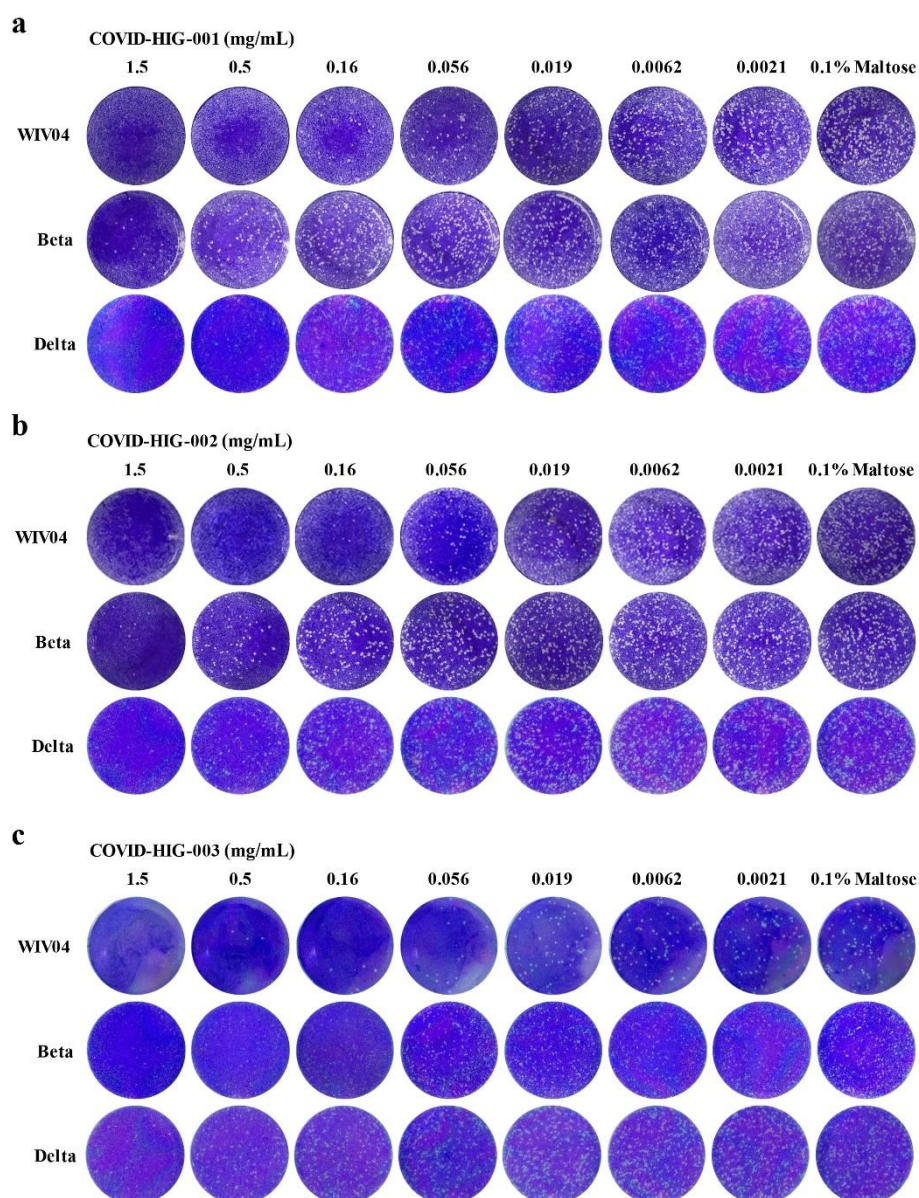

**Figure S2. Plaque reduction neutralization assay of COVID-HIG.** COVID-HIG-001 (a), COVID-HIG-002 (b), and COVID-HIG-003 (c) significantly inhibited infection by SARS-CoV-2 WIV04, Beta, and Delta strains in Vero E6 cells. Maltose was used as a negative control. Viruses were incubated with COVID-HIG at different concentrations at 37°C for 1 h. Thereafter, Vero E6 cells were infected with SARS-CoV-2 WIV04, Beta and Delta strains. The infected cells were stained with hematoxylin/eosin at 48 h (Beta and Delta strains) or 72 h (WIV04 strain) post-infection. WIV04, nCoV-2019BetaCoV/Wuhan/WIV04/2019.

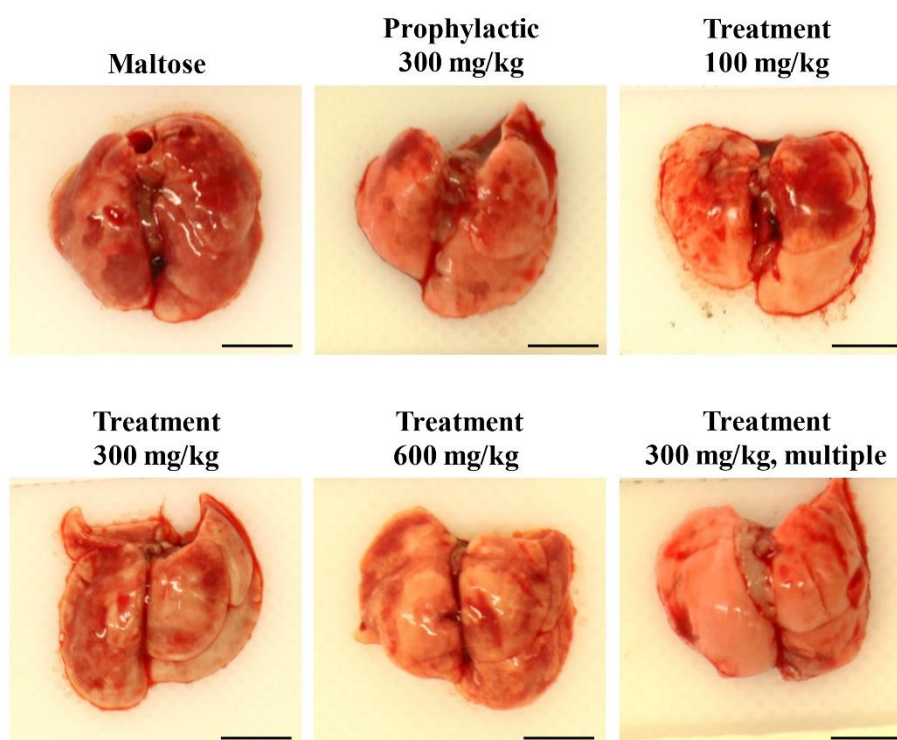

**Figure S3. Gross observation of the lungs of mice treated with COVID-HID 6 days after SARS-COV-2 infection.** Mice in the adjuvant control group had a large range of diffuse crimson lesions in the lungs, whereas the area of crimson lesions in the lungs of mice in the COVID-HIG prevention and treatment groups was significantly reduced. Maltose adjuvant-treated mice were used as the control group. Scale bar = 0.5 cm.



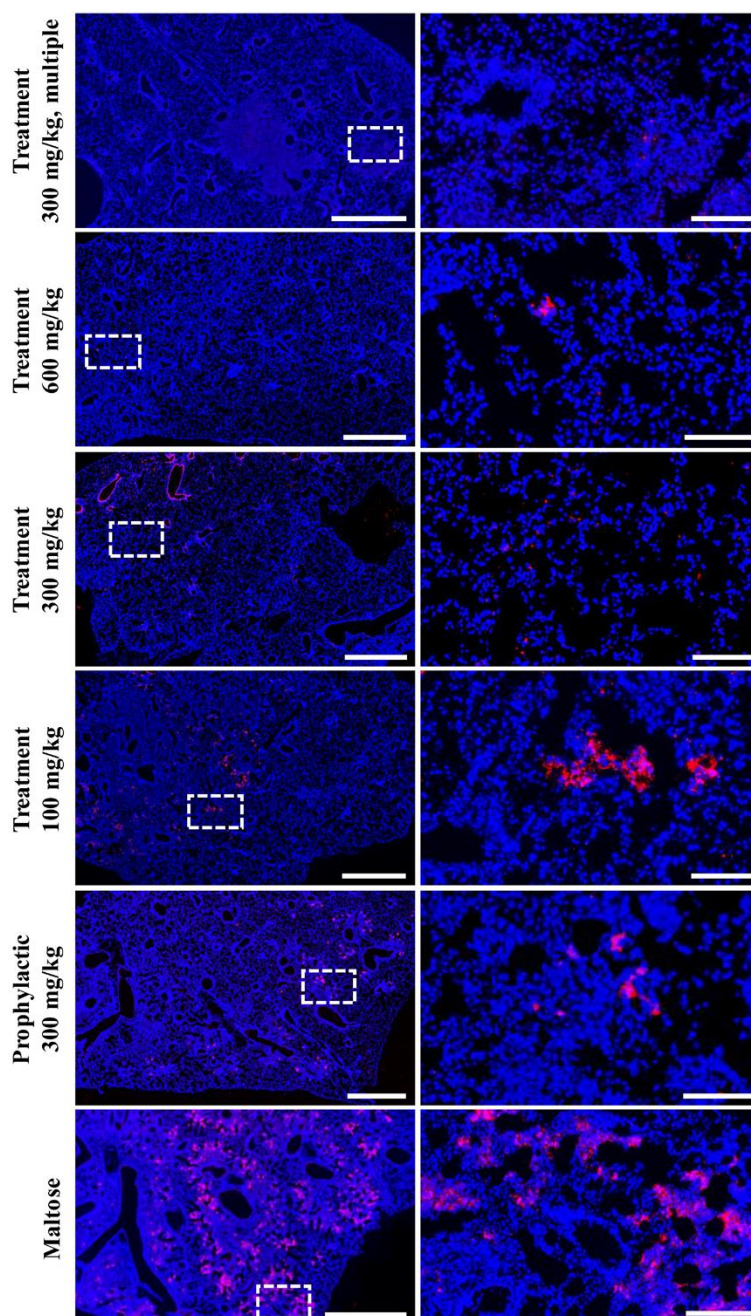

**Figure S4.** Virological analyses of treated and untreated mouse lungs using immunofluorescence staining of SARS-CoV-2 nucleocapsid proteins. Changes in virus protein expression (red fluorescence) in the mouse lungs. Tissues were dissected and collected for fixation, embedding, slicing, and immunofluorescence detection. Maltose-treated mice were used as the adjuvant control group. The figure on the right (scale bar = 100 nm) is an enlarged view of the white dotted box in the figure on the left (scale bar = 1  $\mu$ m).

**Table S1. Total protein and IgG concentrations of PBP and COVID-HIG**

| <b>Lot</b>           | <b>Product</b> | <b>Total protein (mg/mL)</b> | <b>IgG (mg/mL)</b> |
|----------------------|----------------|------------------------------|--------------------|
| <b>COVID-HIG-001</b> | PBP            | 64.7                         | 10.0               |
|                      | COVID-HIG      | 53.2                         | 52.1               |
| <b>COVID-HIG-002</b> | PBP            | 63.0                         | 9.8                |
|                      | COVID-HIG      | 53.0                         | 52.0               |
| <b>COVID-HIG-003</b> | PBP            | 64.9                         | 8.8                |
|                      | COVID-HIG      | 54.2                         | 53.5               |

IgG, immunoglobulin G. PBP, pooled BBIBP-CorV plasma.

**Table S2. IgG subclass distribution of COVID-HIG**

| COVID-HIG Lot    | Distribution of the four IgG subclasses (%) * |                |               |               |
|------------------|-----------------------------------------------|----------------|---------------|---------------|
|                  | IgG1                                          | IgG2           | IgG3          | IgG4          |
| COVID-HIG-001    | 67.38%                                        | 28.09%         | 2.61%         | 1.93%         |
| COVID-HIG-002    | 64.91%                                        | 29.64%         | 3.32%         | 2.13%         |
| COVID-HIG-003    | 65.27%                                        | 29.05%         | 3.51%         | 2.17%         |
| <b>Mean ± SD</b> | 65.85% ± 1.33%                                | 28.93% ± 0.78% | 3.14% ± 0.48% | 2.08% ± 0.13% |

\*Immunoturbidimetry was used for detection.

**Table S3. Summary values of binding affinity, blocking potency, and neutralization potency of COVID-HIG-003**

| Strain                | $K_D$ (nM) |       | $IC_{50}$ (nM) of ELISA | $IC_{50}$ (nM) of PBNA          | PRNT <sub>50</sub> (nM) | Ratio ( $K_D$ /PRNT <sub>50</sub> ) |
|-----------------------|------------|-------|-------------------------|---------------------------------|-------------------------|-------------------------------------|
|                       |            |       |                         |                                 |                         |                                     |
| WIV04<br>(Or Wuhan-1) | S protein  | 4.60  | $2.27 \times 10^3$      | $0.55 \times 10^3$<br>(Wuhan-1) | $0.19 \times 10^3$      | $2.4 \times 10^{-2}$                |
|                       | NTD        | 14.80 |                         |                                 |                         | $7.8 \times 10^{-2}$                |
|                       | NP         | 14.30 |                         |                                 |                         | N/A                                 |
|                       | RBD        | 99.50 |                         |                                 |                         | $5.2 \times 10^{-1}$                |
| Beta                  | RBD        | 5.33  | $4.66 \times 10^3$      | $3.95 \times 10^3$              | $1.44 \times 10^3$      | $3.7 \times 10^{-3}$                |
| Delta                 | RBD        | 21.90 | $1.13 \times 10^3$      | $1.52 \times 10^3$              | $1.61 \times 10^3$      | $1.4 \times 10^{-2}$                |

WIV04, nCoV-2019BetaCoV/Wuhan/WIV04/2019 strain. S, spike. NTD, N-terminal domain of S protein. NP, nucleocapsid protein. RBD, receptor-binding domain of S protein.  $K_D$ , equilibrium dissociation constant. Competitive ELISA assays were performed to calculate the 50% inhibitory concentration values for the blocking ability of COVID-HIG. PBNA, pseudotyped virus-based neutralization assay. PRNT<sub>50</sub>, the 50% plaque reduction neutralization test concentration of COVID-HIG against strains. N/A, not applicable.



**Table S4. Neutralization potency of PBP and COVID-HIG against the pseudotyped SARS-CoV-2 Wuhan-1 strain**

| <b>Lot</b>           | <b>Product</b> | <b>IC<sub>50</sub> (mg/mL)</b> |
|----------------------|----------------|--------------------------------|
| <b>COVID-HIG-001</b> | PBP            | 0.2759                         |
|                      | COVID-HIG      | 0.0856                         |
| <b>COVID-HIG-002</b> | PBP            | 0.2537                         |
|                      | COVID-HIG      | 0.0693                         |
| <b>COVID-HIG-003</b> | PBP            | 0.4582                         |
|                      | COVID-HIG      | 0.0827                         |

Wuhan-1, SARS-CoV-2 Wuhan-Hu-1 strain. PBP, pooled BBIBP-CorV plasma.

**Table S5. Gross pathological findings**

| Group                            | ID # | Severity grade* |                 |          |              | Individual <sup>#</sup> | Group mean |
|----------------------------------|------|-----------------|-----------------|----------|--------------|-------------------------|------------|
|                                  |      | Alveolar wall   | Alveolar cavity | Bronchus | Blood vessel |                         |            |
| Maltose                          | 1    | +++             | ++              | +++      | +++          | 5                       | 5.0        |
|                                  | 2    | +++             | +++             | +++      | +++          | 6                       |            |
|                                  | 3    | +++             | +++             | +++      | +++          | 6                       |            |
|                                  | 4    | +++             | ++              | +++      | +++          | 5                       |            |
|                                  | 5    | +++             | +++             | +++      | +++          | 6                       |            |
|                                  | 6    | +++             | ++              | +++      | +++          | 5                       |            |
|                                  | 7    | ++              | ++              | ++       | +++          | 4                       |            |
|                                  | 8    | +               | +               | ++       | ++           | 3                       |            |
| COVID-HIG<br>300 mg/kg, -24h     | 1    | +               | -               | ++       | ++           | 2                       | 2.8        |
|                                  | 2    | ++              | ++              | +        | -            | 2                       |            |
|                                  | 3    | ++              | ++              | ++       | ++           | 3                       |            |
|                                  | 4    | ++              | ++              | ++       | +++          | 4                       |            |
|                                  | 5    | -               | -               | -        | +            | 1                       |            |
|                                  | 6    | +               | +               | ++       | +++          | 3                       |            |
|                                  | 7    | ++              | ++              | +++      | ++           | 4                       |            |
|                                  | 8    | +               | ++              | ++       | +++          | 3                       |            |
| COVID-HIG<br>300 mg/kg, multiple | 1    | +               | +               | +++      | +++          | 4                       | 2.9        |
|                                  | 2    | +               | -               | +        | ++           | 2                       |            |
|                                  | 3    | ++              | +               | ++       | +++          | 3                       |            |
|                                  | 4    | +               | ++              | ++       | +++          | 4                       |            |
|                                  | 5    | ++              | +++             | +++      | +++          | 5                       |            |
|                                  | 6    | +               | -               | +        | +            | 1                       |            |
|                                  | 7    | ++              | ++              | ++       | ++           | 3                       |            |
|                                  | 8    | -               | -               | -        | +            | 1                       |            |
| COVID-HIG<br>600 mg/kg, +2 h     | 1    | +               | +               | ++       | +++          | 3                       | 3.2        |
|                                  | 2    | +               | ++              | +++      | ++           | 4                       |            |
|                                  | 3    | +               | ++              | ++       | +++          | 4                       |            |
|                                  | 4    | +++             | ++              | ++       | ++           | 4                       |            |
|                                  | 5    | +               | -               | +        | +            | 1                       |            |
|                                  | 6    | +               | +               | +        | ++           | 2                       |            |
|                                  | 7    | +               | +               | +++      | ++           | 3                       |            |
|                                  | 8    | ++              | +++             | +++      | +++          | 5                       |            |
| COVID-HIG<br>300 mg/kg, +2 h     | 1    | ++              | +               | ++       | +++          | 4                       | 3.9        |
|                                  | 2    | +++             | +++             | +++      | +++          | 6                       |            |
|                                  | 3    | +               | -               | +        | +            | 1                       |            |
|                                  | 4    | ++              | ++              | ++       | +++          | 4                       |            |
|                                  | 5    | ++              | ++              | ++       | +++          | 4                       |            |
|                                  | 6    | ++              | ++              | ++       | +++          | 4                       |            |
|                                  | 7    | ++              | +++             | +++      | ++           | 4                       |            |
|                                  | 8    | ++              | +               | ++       | +++          | 4                       |            |
| COVID-HIG<br>100 mg/kg, +2 h     | 1    | +++             | ++              | +++      | +++          | 5                       | 3.6        |
|                                  | 2    | +++             | +++             | ++       | +++          | 5                       |            |
|                                  | 3    | +               | +               | ++       | +++          | 3                       |            |
|                                  | 4    | ++              | ++              | ++       | +++          | 4                       |            |
|                                  | 5    | +++             | ++              | ++       | +++          | 5                       |            |
|                                  | 6    | ++              | ++              | +        | +++          | 4                       |            |
|                                  | 7    | +               | -               | -        | +            | 1                       |            |
|                                  | 8    | +               | +               | +        | ++           | 2                       |            |

\*In a single score, - indicates no pathological changes; + indicates mild lesions; ++ indicates moderate lesions; +++ indicates severe lesions. #The comprehensive score was assigned

according to the standards introduced in the Materials and Methods; 0, no lesion; 1–2, mild lesions; 3–4, moderate lesions; 5–6, severe lesions.

-24 h, COVID-HIG prophylactic groups; +2 h, COVID-HIG treatment groups.

**Table S6. RBD-IgG titer of PBP and COVID-HIG**

| <b>Lot</b>           | <b>Product</b> | <b>RBD-IgG Titer</b> |
|----------------------|----------------|----------------------|
| <b>COVID-HIG-001</b> | PBP            | 1:944                |
|                      | COVID-HIG      | 1:5,184              |
| <b>COVID-HIG-002</b> | PBP            | 1:674                |
|                      | COVID-HIG      | 1:5,919              |
| <b>COVID-HIG-003</b> | PBP            | 1:551                |
|                      | COVID-HIG      | 1:4,737              |

RBD, receptor-binding domain; PBP, pooled BBIBP-CorV plasma.

**Table S7. Basic information of pseudotyped SARS-CoV-2 viruses**

| Pseudotyped virus | S gene source     | Spike mutation site                                                                                                                                                                                                                                                           | Manufacturer                                      |
|-------------------|-------------------|-------------------------------------------------------------------------------------------------------------------------------------------------------------------------------------------------------------------------------------------------------------------------------|---------------------------------------------------|
| Wuhan-1           |                   | /                                                                                                                                                                                                                                                                             |                                                   |
| D614G             |                   | D614G                                                                                                                                                                                                                                                                         |                                                   |
| Alpha             |                   | delta69-70HV, delta144Y, N501Y, A570D, D614G, P681H, T716I, S982A, D118H                                                                                                                                                                                                      |                                                   |
| Beta              |                   | L18F, D80A, D215G, delta242-244LAL, R246I, K417N, E484K, N501Y, D614G, A701V                                                                                                                                                                                                  |                                                   |
| Gamma             | GenBank: MN908947 | L18F, T20N, P26S, D138Y, R190S, K417T, E484K, N501Y, D614G, H655Y, T1027I, V1176F                                                                                                                                                                                             | Gobond Science and Technology (Beijing) Co., Ltd. |
| Kappa             |                   | G142D, E154K, L452R, E484Q, D614G, P681R, Q1071H, H1101D                                                                                                                                                                                                                      |                                                   |
| Delta             |                   | T19R, G142D, F157del, R158del, L452R, T478K, D614G, P681R, D950N                                                                                                                                                                                                              |                                                   |
| Omicron           |                   | A67V, H69del, V70del, T95I, G142D, V143del, Y144del, Y145del, N211del, L212I, ins214EPE, G339D, S371L, S373P, S375F, K417N, N440K, G446S, S477N, T478K, E484A, Q493R, G496S, Q498R, N501Y, Y505H, T547K, D614G, H655Y, N679K, P681H, N764K, D796Y, N856K, Q954H, N969K, L981F |                                                   |

Wuhan-1, SARS-CoV-2 Wuhan-Hu-1 strain.

**Table S8. Gross severity grades recorded for the lung based on the percent lobe affected by gross changes**

| <b>Pathological change score</b> | <b>Judgment basis</b>                                                                                                                                                                                                                                                                                                                                                      | <b>Evaluation of damage rating</b> |
|----------------------------------|----------------------------------------------------------------------------------------------------------------------------------------------------------------------------------------------------------------------------------------------------------------------------------------------------------------------------------------------------------------------------|------------------------------------|
| 6                                | More than 75% of the lungs had diffuse alveolar injury; the alveolar wall was significantly thickened, an alveolar hyaline membrane was formed, and fibrosis was significant; most small bronchial epithelium proliferated and dropped off considerably; edema and hyperplasia of vascular endothelial cells were significant; inflammatory cell infiltration was diffuse. | Severe                             |
| 5                                | Here, 51%–75% of the lung had diffuse alveolar injury; alveolar wall thickening was obvious, an alveolar hyaline membrane was formed, and fibrosis was obvious; most small bronchial epithelium proliferated and dropped off considerably; edema and hyperplasia of vascular endothelial cells were obvious; inflammatory cell infiltration was diffuse                    |                                    |
| 4                                | Here, 36%–50% of the lung had moderate injury; some alveolar walls were thickened, alveolar fibrin exudation and fibrosis were obvious; some bronchiolar epithelium hyperplasia and necrosis were present; edema and hyperplasia of some vascular endothelial cells; significant infiltration of inflammatory cells.                                                       | Moderate                           |
| 3                                | In this case, 21%–35% of the lung had mild to moderate injury; some alveolar walls were thickened; fibrin exudation and fibrosis were rare in alveoli; partial bronchiolar epithelial hyperplasia was observed; significant infiltration of inflammatory cells was present                                                                                                 |                                    |
| 2                                | Here, 5%–20% of the lung had mild pathological injury; most alveolar walls and alveolar cavities had normal structures; a small part of the alveolar walls was thickened; fibrin exudation and fibrosis were seen in alveoli; small amount of bronchiolar epithelium hyperplasia was observed; a small amount of monocyte and lymphocyte infiltration was observed.        | Mild                               |
| 1                                | Finally, <5% of the lung had slight pathological injury; most alveoli, bronchi, and blood vessels had normal structures; very few alveolar walls were thickened; fibrin exudation and fibrosis were rare in alveoli; individual bronchiolar epithelial hyperplasia was observed; a small amount of mononuclear and lymphocyte infiltration was occasionally was observed.  |                                    |
| 0                                | The alveolar structure was intact; there was no inflammatory infiltration and no congestion; the bronchial and vascular structures were normal.                                                                                                                                                                                                                            | None                               |
